# Supplementary material for: Kawasaki Disease Patient Stratification and Pathway Analysis Based on Host Transcriptomic and Proteomic Profiles
Source: MDPI journal article supplement (doi:10.3390/ijms22115655), 2021-05-26
Supplement: s1 [file s1]

**Table S1.** Patient information for each dataset split by disease group. Ages are in months with age range in brackets.

|                        | Kawasaki disease |               |             | Definite bacterial |               |             | Definite viral |               |             | Healthy controls |                |             |
|------------------------|------------------|---------------|-------------|--------------------|---------------|-------------|----------------|---------------|-------------|------------------|----------------|-------------|
|                        | N                | Median age    | Males       | N                  | Median age    | Males       | N              | Median age    | Males       | N                | Median age     | Males       |
| <i>Transcriptomics</i> |                  |               |             |                    |               |             |                |               |             |                  |                |             |
| Discovery              | 77               | 26<br>(3-178) | 42<br>(55%) | 31                 | 22<br>(0-171) | 16<br>(52%) | 92             | 14<br>(0-175) | 65<br>(70%) | 62               | 40<br>(0-182)  | 31<br>(50%) |
| Validation             | 101              | 37<br>(4-182) | 61<br>(60%) | 23                 | 22<br>(7-132) | 10<br>(44%) | 28             | 18<br>(0-172) | 17<br>(60%) | NA               | NA             | NA          |
| <i>Proteomics</i>      |                  |               |             |                    |               |             |                |               |             |                  |                |             |
| Discovery              | 26               | 30<br>(3-210) | 18<br>(69%) | 73                 | 57<br>(0-205) | 41<br>(56%) | 75             | 37<br>(0-180) | 42<br>(56%) | 25               | 58<br>(1-155)  | 17<br>(68%) |
| Validation             | 26               | 16<br>(0-210) | 18<br>(69%) | 48                 | 25<br>(1-191) | 24<br>(50%) | 31             | 11<br>(0-97)  | 14<br>(45%) | 25               | 101<br>(3-191) | 12<br>(48%) |

**Table S2.** Clinical information for the KD samples in all four datasets used in the analysis.

|                                                   | <i>Transcriptomics</i>    |                           | <i>Proteomics</i>         |                          |
|---------------------------------------------------|---------------------------|---------------------------|---------------------------|--------------------------|
|                                                   | Discovery                 | Validation                | Discovery                 | Validation               |
| No. of patients                                   | 77                        | 101                       | 26                        | 26                       |
| Age, median (range), months                       | 26 (3-178)                | 37 (4-182)                | 30 (3-210)                | 16 (0-210)               |
| Male sex, No. (%)                                 | 42 (55)                   | 61 (60)                   | 18 (69)                   | 18 (69)                  |
| Day of fever at sample collection, median (range) | 5 (2 to 7)                | 6 (2 to 10)               | 7 (3 to 20)               | 6.5 (4 to 22)            |
| Coronary artery abnormalities, No (%)             | 33 (43)                   | 27 (27)                   | 8 (30)                    | 6 (23)                   |
| Laboratory values, median (IQR)                   |                           |                           |                           |                          |
| Hemoglobin z-score                                | -1.3 (-2.0 to -0.3)       | -1.2 (-2.0 to -0.4)       | -0.22 (-0.24 to -0.19)    | -0.3 (-0.31 to -0.26)    |
| C-reactive protein mg/L                           | 119 (48 to 192)           | 87 (59 to 173)            | 92 (43 to 167)            | 92 (59 to 167)           |
| Platelet count x10 <sup>3</sup> /μl               | 352 (303 to 448)          | 408 (324 to 474)          | 319 (252 to 407)          | 303 (250 to 425)         |
| White blood cell count /μl                        | 14 200 (10 400 to 18 300) | 13 900 (11 000 to 19 000) | 13 900 (12 150 to 18 275) | 13300 (10 500 to 18 200) |
| Neutrophil count /μl                              | 9000 (6600 to 12 400)     | 10 000 (7 300 to 12 600)  | 10 500 (7125 to 14 200)   | 8800 (6600 to 11 950)    |

**Table S3** shows the frequency of causative pathogens or disease present in the four datasets used. Causative pathogen refers to the pathogen identified that is causing infection.

| Pathogen/disease               | Transcriptomic<br>discovery | Transcriptomic<br>validation | Proteomic<br>discovery | Proteomic<br>validation |
|--------------------------------|-----------------------------|------------------------------|------------------------|-------------------------|
| <i>Bacterial</i>               | <i>n</i> = 31               | <i>n</i> = 23                | <i>n</i> = 73          | <i>n</i> = 48           |
| Unknown                        | 0                           | 1                            | 4                      | 2                       |
| <i>Gram negative bacterial</i> | <i>n</i> = 14               | <i>n</i> = 0                 | <i>n</i> = 38          | <i>n</i> = 23           |
| Meningococcal                  | 10                          | 0                            | 5                      | 11                      |
| <i>E. coli</i>                 | 2                           | 0                            | 21                     | 1                       |
| <i>H. influenzae</i>           | 1                           | 0                            | 3                      | 1                       |
| <i>P. aeruginosa</i>           | 0                           | 0                            | 4                      | 3                       |
| <i>C. freundii</i>             | 0                           | 0                            | 2                      | 0                       |
| <i>K. pneumoniae</i>           | 0                           | 0                            | 1                      | 2                       |
| <i>P. mirabilis</i>            | 0                           | 0                            | 1                      | 0                       |
| <i>K. kingae</i>               | 1                           | 0                            | 0                      | 1                       |
| <i>S. marcescens</i>           | 0                           | 0                            | 1                      | 0                       |
| <i>Pertussis</i>               | 0                           | 0                            | 0                      | 2                       |
| Coliform                       | 0                           | 0                            | 0                      | 1                       |
| Campylobacter                  | 0                           | 0                            | 0                      | 1                       |
| <i>Gram positive bacterial</i> | <i>n</i> = 17               | <i>n</i> = 22                | <i>n</i> = 31          | <i>n</i> = 23           |
| Pneumococcus                   | 6                           | 15                           | 3                      | 5                       |
| Group A strep.                 | 6                           | 5                            | 14                     | 5                       |
| Group B strep.                 | 3                           | 0                            | 0                      | 0                       |
| Necrotizing pneumonia          | 1                           | 0                            | 0                      | 0                       |
| <i>S. aureus</i>               | 1                           | 2                            | 9                      | 8                       |
| Enterococcus                   | 0                           | 0                            | 4                      | 1                       |
| <i>A. urinae</i>               | 0                           | 0                            | 1                      | 0                       |
| <i>S. anginosus</i>            | 0                           | 0                            | 0                      | 2                       |
| <i>S. warneri</i>              | 0                           | 0                            | 0                      | 1                       |
| Actinomyces                    | 0                           | 0                            | 0                      | 1                       |
| <i>Viral</i>                   | <i>n</i> = 92               | <i>n</i> = 28                | <i>n</i> = 75          | <i>n</i> = 31           |
| Unknown                        | 5                           | 1                            | 0                      | 1                       |
| RSV                            | 27                          | 10                           | 6                      | 5                       |
| Adenovirus                     | 23                          | 2                            | 9                      | 3                       |
| Influenza                      | 23                          | 13                           | 19                     | 3                       |
| Rhinovirus                     | 6                           | 1                            | 10                     | 4                       |
| Bronchiolitis                  | 3                           | 0                            | 0                      | 0                       |
| URTI                           | 1                           | 0                            | 0                      | 0                       |
| Parainfluenza                  | 1                           | 0                            | 3                      | 0                       |
| Parechovirus                   | 1                           | 0                            | 0                      | 3                       |
| Pneumonia                      | 1                           | 0                            | 0                      | 0                       |
| HSV                            | 1                           | 0                            | 4                      | 1                       |
| Measles                        | 0                           | 0                            | 4                      | 0                       |
| EBV                            | 0                           | 0                            | 7                      | 0                       |
| Enterovirus                    | 0                           | 1                            | 4                      | 6                       |
| Coronavirus (not SARS-CoV-2)   | 0                           | 0                            | 1                      | 0                       |
| Cytomegalovirus                | 0                           | 0                            | 1                      | 0                       |
| HMPV                           | 0                           | 0                            | 2                      | 0                       |
| Norovirus                      | 0                           | 0                            | 1                      | 0                       |
| VZV                            | 0                           | 0                            | 1                      | 0                       |
| Rotavirus                      | 0                           | 0                            | 0                      | 2                       |
| HHV6                           | 0                           | 0                            | 0                      | 3                       |

**Table S4.** The genes selected by Lasso in the bacterial classifier with their Lasso weights. Positive Lasso weights indicate higher abundance in bacterial transcriptomic samples compared to viral and healthy control transcriptomic samples and negative Lasso weights indicate lower abundance in bacterial transcriptomic samples.

| Illumina ID  | Gene symbol | Lasso weight |
|--------------|-------------|--------------|
| ILMN_1684271 | ACBD6       | 2.26         |
| ILMN_1779547 | HPSE        | 1.84         |
| ILMN_1662427 | PTP4A3      | 1.77         |
| ILMN_1711368 | TRAPPC9     | 1.21         |
| ILMN_2087692 | CYBRD1      | 1.13         |
| ILMN_1749115 | RTN2        | 0.99         |
| ILMN_2169490 | TDRD9       | 0.78         |
| ILMN_1806612 | LOC647104   | 0.67         |
| ILMN_1663035 | SREBF1      | 0.65         |
| ILMN_3202002 | LOC643332   | 0.61         |
| ILMN_1803819 | IQGAP1      | 0.60         |
| ILMN_1677200 | CYFIP2      | 0.60         |
| ILMN_2058795 | PGCP        | 0.56         |
| ILMN_1807540 | CBARA1      | 0.56         |
| ILMN_1673544 | C1orf83     | 0.54         |
| ILMN_1688780 | S100A4      | 0.53         |
| ILMN_1764769 | VWA5A       | 0.52         |
| ILMN_3295847 | LOC645387   | 0.51         |
| ILMN_1698225 | MYO5A       | 0.50         |
| ILMN_1758672 | FAM107B     | 0.45         |
| ILMN_2397028 | SERPINB8    | 0.42         |
| ILMN_1794967 | EIF4ENIF1   | 0.42         |
| ILMN_2121816 | GPR137B     | 0.27         |
| ILMN_1690342 | LTA4H       | 0.21         |
| ILMN_1814924 | FAM55C      | 0.20         |
| ILMN_3262439 | FLJ46552    | 0.03         |
| ILMN_1664464 | PTGDS       | -0.09        |
| ILMN_1769299 | MTMR11      | -0.11        |
| ILMN_1677693 | GPR109B     | -0.14        |
| ILMN_1699856 | RALGDS      | -0.27        |
| ILMN_1712026 | NLRP3       | -0.28        |
| ILMN_1706455 | TTC5        | -0.40        |
| ILMN_2320336 | CLK3        | -0.57        |
| ILMN_2310896 | NLRP3       | -0.74        |
| ILMN_1761828 | E2F4        | -0.89        |
| ILMN_1785037 | SSR2        | -1.13        |
| ILMN_1754076 | CACNA2D3    | -1.20        |
| ILMN_1762594 | NOD2        | -1.47        |

**Table S5.** The genes selected by Lasso in the viral classifier with their Lasso weights. Positive Lasso weights indicate higher abundance in viral transcriptomic samples compared to bacterial and healthy control transcriptomic samples and negative Lasso weights indicate lower abundance in viral transcriptomic samples.

| Illumina ID  | Gene symbol | Lasso weight |
|--------------|-------------|--------------|
| ILMN_2099586 | CCDC28B     | 1.15         |
| ILMN_2348975 | NASP        | 0.88         |
| ILMN_2330307 | SLC43A3     | 0.62         |
| ILMN_2058782 | IFI27       | 0.41         |
| ILMN_1667893 | TNS3        | 0.23         |
| ILMN_1761010 | PCCB        | 0.19         |
| ILMN_1714990 | DBT         | 0.18         |
| ILMN_1751120 | HIST1H4H    | 0.14         |
| ILMN_1747744 | LHFPL2      | 0.05         |
| ILMN_1672124 | C4orf18     | 0.05         |
| ILMN_1811955 | PRMT5       | 0.03         |
| ILMN_3306019 | LOC729535   | 0.01         |
| ILMN_1669062 | CCR2        | 0.01         |
| ILMN_2128795 | LRIG1       | -0.01        |
| ILMN_2087692 | CYBRD1      | -0.03        |
| ILMN_1655549 | SIGLEC10    | -0.03        |
| ILMN_1718936 | LST1        | -0.03        |
| ILMN_1770824 | ARHGAP4     | -0.04        |
| ILMN_1864900 | MIAT        | -0.04        |
| ILMN_2360401 | LFNG        | -0.04        |
| ILMN_2321578 | P2RY10      | -0.06        |
| ILMN_1666546 | DUSP14      | -0.08        |
| ILMN_1738579 | VHL         | -0.19        |
| ILMN_1803423 | ARHGEF6     | -0.21        |
| ILMN_1729237 | CYB5R1      | -0.22        |
| ILMN_1767509 | DEF8        | -0.24        |
| ILMN_1799030 | CMTM2       | -0.34        |
| ILMN_1794677 | TMC6        | -0.45        |
| ILMN_1688373 | LST1        | -0.50        |
| ILMN_1757827 | ECOP        | -0.61        |
| ILMN_1712469 | GOLGA8A     | -0.75        |
| ILMN_2231020 | TMEM185B    | -1.08        |

**Table S6.** The proteins selected by Lasso in the bacterial classifier with their Lasso weights. Positive Lasso weights indicate higher abundance in bacterial samples compared to viral and healthy control samples and negative Lasso weights indicate lower abundance in bacterial samples. Uniprot IDs with \* mean that the LFC direction and Lasso direction were not concordant.

| Uniprot | Symbol | Lasso weight |
|---------|--------|--------------|
| P05090* | APOD   | 25.02        |
| Q14624  | ITIH4  | 22.5         |
| P01011  | AACT   | 15.29        |
| P00740  | FA9    | 10.79        |
| P05543* | THBG   | 10.62        |
| P01042* | KNG1   | 9.86         |
| P00751  | CFAB   | 9.39         |
| P0DJ18  | SAA1   | 3.96         |
| P08697* | A2AP   | 1.85         |
| O14791* | APOL1  | 1.13         |
| P01031  | CO5    | 0.98         |
| Q96IY4* | CBPB2  | 0.7          |
| Q9UK55* | ZPI    | -0.57        |
| P10643  | CO7    | -0.93        |
| P02743* | SAMP   | -3.58        |
| O00533  | NCHL1  | -3.83        |
| P02649  | APOE   | -4.59        |
| O75636  | FCN3   | -5.06        |
| P12259  | FA5    | -7.57        |
| P02765  | FETUA  | -8.54        |
| P48740  | MASP1  | -10.62       |
| P00747  | PLMN   | -11.82       |
| P10909  | CLUS   | -15.19       |
| P04004  | VTNC   | -20.56       |
| P01008  | ANT3   | -26.25       |
| P05155  | IC1    | -27.65       |

**Table S7** The proteins selected by Lasso in the viral classifier with their Lasso weights. Positive Lasso weights indicate higher abundance in viral samples compared to bacterial and healthy control samples and negative Lasso weights indicate lower abundance in viral samples. Uniprot IDs with \* mean that the LFC direction and Lasso direction were not concordant.

| Uniprot | Symbol | Lasso weight |
|---------|--------|--------------|
| P05155  | IC1    | 30.93        |
| P04004  | VTNC   | 24.06        |
| P10909  | CLUS   | 16.97        |
| P01008  | ANT3   | 12.98        |
| O75636  | FCN3   | 9.44         |
| P00747  | PLMN   | 5.42         |
| P05543  | THBG   | 3.06         |
| P02765  | FETUA  | 2.48         |
| P02743  | SAMP   | 2.31         |
| Q08380  | LG3BP  | 2.01         |
| O00533  | NCHL1  | 0.05         |
| P01031  | CO5    | -0.19        |
| P01011  | AACT   | -0.75        |
| P04196  | HRG    | -1.57        |
| P05090* | APOD   | -1.8         |
| P00751* | CFAB   | -2.5         |
| Q96IY4  | CBPB2  | -3.47        |
| P01042* | KNG1   | -8.28        |
| P00740  | FA9    | -8.98        |
| Q14624  | ITIH4  | -15.83       |
